# Supplementary material for: Tandem cobalt mediated rearrangement and Pauson–Khand reaction for the synthesis of functionalised polycyclic systemsElectronic supplementary information (ESI) available: experimental procedures and data for all new compounds. See http://www.rsc.org/suppdata/cc/b2/b204616b/
Source: Royal Society of Chemistry journal article supplement (doi:10.1039/b204616b), 2002-06-17
Supplement: b204616b.doc [file b204616b.doc]

# Supplementary Material

General

Infrared (IR) spectra were recorded on a Perkin Elmer Paragon 100 FTIR spectrophotometer, max in cm-1. Bands are characterized as broad (br), strong (s), medium (m) and weak (w). NMR spectra were recorded on a Bruker AC-250 (250 MHz for 1H and 62.9 MHz for 13C) or an AMX-400 (400 MHz for 1H and 100 MHzfor 13C). Chemical shifts are reported in ppm from tetramethylsilane with the solvent resonance as the internal standard (CHCl3: 7.27 ppm fo­­r ­1H, CDCl3:77.0 ppm for 13C, with complete proton decoupling.) Data are reported as follows: chemical shift, integration, multiplicity (s=singlet, d=doublet, t=triplet, q=quartet, p=pentet, h=heptet, sx=sextet, b=broad, m=multiplet), coupling constants, *J*, (Hz), and assignment (prop. = propargylic, eq. = equatorial). High resolution mass spectra were obtained using a Kratos MS 80 spectrometer supported by a DS 90 data system.

# All reactions were conducted in flame-dried glassware under an inert atmosphere of dry nitrogen. All reagents were used as received from commercial suppliers unless otherwise stated. Tetrahydrofuran were distilled from sodium metal/benzophenone ketal. Petroleum ether (40 C-60 C) distilled from molecular sieves. Dichloromethane, 1,2-dichloroethane and toluene were distilled from calcium hydride. Flash chromatography was performed on silica gel (Merck Kieselgel 60 F254 230-400 mesh). Thin layer chromatography (TLC) was performed on aluminium backed plates pre-coated with silica (0.2 mm, Merck DC-alufolien Kieselgel 60 F254) which were developed using standard visualizing agents: UV fluorescence (254 and 366 nm), potassium permanganate / .

To a solution of lactol (364 mg, 2.02 mmol, 1.0 eq.)[[1]](#footnote-2) and freshly activated ground 4Å molecular sieves in acetonitrile (5 ml) was added hydrogen triphenylphosphonium tetrafluoroborate (770 mg, 2.20 mmol, 1.1 eq.) and the mixture was heated at reflux for 2 hours. After cooling the reaction to room temperature, the solvent was removed *in vacuo* and the residue taken up in dichloromethane. This solution was filtered through a pad of celite and the solvent was removed *in vacuo*. Tetrahydrofuran (5 ml) was added and the resulting solution was cooled to –78 C. After 5 minutes stirring, *n*-butyllithium (2.5M in hexanes, 0.9 ml, 2.25 mmol, 1.1 eq.) was added *via* syringe and stirred for a further 5 minutes producing a deep red coloured solution. Neat 4-pentenal (220 l, 2.23 mmol, 1.1 eq.) was added dropwise *via* syringe to the ylid solution at –78 C. After one hour stirring at –78 C, the reaction mixture was allowed to reach room temperature and left for 1 hour before quenching the reaction with water. The aqueous layer was extracted twice with diethyl ether washed with water and a saturated brine solution before drying over magnesium sulfate and filtering through a pad of celite. The solvent was removed *in vacuo* and the resulting residue was chromatographed on silica gel (petroleum ether (40 C-60 C)/ether/Et3N 20:2:1) to yield the cyclic enol ether together with triphenylphosphine. A solution of crude cyclic enol ether was added to octacarbonyl dicobalt (643 mg, 188 mmol, 0.9 eq.) in petroleum ether (40 C-60 C) (10 ml), stirred for two hours at room temperature before filtering through a pad of celite. Removal of the solvent *in vacuo* afforded crude enol ether complex which was further purified on silica gel eluting with petroleum ether (40 C-60 C)/ether/Et3N 100/5/1 to furnish enol ether complex **2** (739.6 mg, 1.43 mmol, 71%) as an inseparable mixture of 5.4:1 *exo*/*endo* cyclic enol ether isomers. The ratio *E/Z* exocyclic enol ether isomers could not be determined through 1H NMR spectroscopy however, was observed to be approximately 2:1 *E/Z* as estimated through 13C NMR spectroscopy.

FTIR: (film/cm-1) υmax: 3078(w), 2934(s), 2864(s), 2821(s), 2090(s), 2022(s), 2009(s), 1680(m), 1641(w), 1617(w).

1H NMR (250 MHz, CDCl3): 1.02 (3H, t, *J*=7.2 Hz, CH3), 1.38-1.82 (6H, m, CH2), 1.84-2.31 (7H, m, CH2), 2.41-2.61 (1H, m, O(C=C)CH2eq), 2.74-2.96 (2H, m, prop.CH2), 4.62 (2H, m, prop.CH, O-C=CH, *Z*-isomer), 4.83-5.14 (3H, m, C=CH2, O-C=CH, *E*-isomer), 5.68-5.98 (1H, m, CH=CH2).

13C NMR (100 MHz, CDCl3):  (*E*-isomer) 13.9, 22.6, 23.1, 24.0, 25.5, 33.5 (2xC), 33.9, 34.5, 79.6, 97.4, 98.7, 107.8, 114.6, 138.4, 152.9, 200.0(b).  (Z-isomer) 13.9, 22.7, 23.6, 23.8, 26.0, 29.4, 33.6, 34.0, 34.1, 79.0, 97.3, 98.6, 107.7, 114.2, 138.7, 152.9, 200.0(b).[[2]](#footnote-3)

FTIR: (film/cm-1) υmax: 3069(s), 2966(s), 2918(s), 2846(s), 2093(s), 2045(s), 1681(s), 1642(s).

1H NMR (250 MHz, CDCl3):  0.98 (3H, t, *J=*7.2 Hz, CH3), 1.39-1.84 (8H, m, CH2), 1.96-2.37 (6H, m, CH2), 2.76-2.90 (2H, m, propCH2), 4.54 (1H, d, *J*=4.5 Hz, propCH), 4.82-5.06 (3H, m, vinylCH2, *endo*-vinylCH), 5.79 (1H, ddt, *J*=17.0, 10.3, 6.7 Hz, vinylCH).

13C NMR (100 MHz, CDCl3):  13.9, 21.1, 22.7, 25.9, 29.7, 30.4, 33.1, 33.5, 34.0, 75.6, 94.9, 97.3, 98.4, 114.4, 138.8, 154.4, 200.0(b).

RMS (Electrospray) calcd. for C22H25Co2O7 (MH+): 519.0264. Found 519.0262 (for *E*/*Z*-*exo* and *endo* isomers).

Enol ether complex mixture (5.4:1 *exo*/*endo*-cyclic isomers (38 mg, 0.073 mmol, 1.0 eq.), in dichloromethane (5ml) was added *via* cannula to a flame dried flask and cooled to –78 0C. Di-*n-­*butylboron trifluoromethanesulfonate (1M in DCM, 220 l, 0.219 mmol, 3.0 eq.) was added slowly over 5 minutes to the reaction vessel and the reaction allowed to stir for 30 minutes at –78 0C. Acetone/H2O (5/1, 1.0 ml) was added at –78 0C and the reaction mixture allowed to warm to 0 0C before pouring into water and extracting with diethyl ether (2x10 ml). The organic extract was dried over MgSO4, filtered through a pad of celite and the solvent removed *in vacuo*. Further purification on silica (petroleum ether 40 0C-60 0C/diethyl ether 15:1) afforded *syn*-ketone complex **6** (23.4 mg, 0.045 mmol, 68%, 81% based on present *exo*cyclic enol ether.)

FTIR: (film/cm-1) υmax: 3080(m), 2936(s), 2872 (s), 2087(s), 2045(s), 2026(s), 2006(s), 1716(s), 1642(m).

1H NMR (250 MHz, CDCl3):  0.99 (3H, t, *J*=7.2 Hz, CH3), 1.31-2.09 (11H, m, CH2), 2.11-2.21 (1H, m, CH2), 2.33 (1H, dt, *J*=14.0, 3.7 Hz, CH2), 2.49-2.72 (2H, m, CH2), 2.75-2.86 (2H, m, prop.CH2), 3.28 (1H, ddd, *J=*10.1, 4.9, 4.4 Hz, prop.CH), 4.89-5.04 (2H, m, vinylCH2), 5.64-5.90 (1H, m, vinylCH).

13C NMR (100 MHz, CDCl3): 13.3, 22.7, 25.4, 26.3, 29.7, 30.9, 33.9, 34.0, 37.7, 47.7, 57.1, 98.0, 100.8, 115.4, 137.2, 200.0(b), 212.5.

HRMS: (Electrospray) calcd. for C22H25Co2O7 (M+H+): 519:0264. Found: 519.0262.

Complex **2** (180 mg, 0.345 mmol, 1.0 eq.) in DCM (10 ml) was cooled to –78 0C, treated with neat titanium tetrachloride (57 l, 0.52 mmol, 1.5 eq.) and stirred at –78 0C for 30 minutes before quenching at –78 0C with wet acetone. The mixture was extracted with DCM, washed with water, dried over MgSO4, filtered through a pad of celite and solvent removed *in vacuo.* The crude mixture was further purified on silica gel (petroleum ether 40 0C-60 0C/diethyl ether 10:1, increasing to 3:1) affording complexes **2**-*endo*(66.7 mg, 0.129 mmol, 37%), **4** (71.3 mg, 0.135 mmol, 39%), **5** (41.3 mg, 0.079 mmol, 23%).

Elucidation of the stereochemistry of **4** could not be definitively achieved by 1H COSY and ROESY experiments. An unambiguous determination will form part of a further study on the Prins cyclisation. A second chlorohydrin complex was isolated occasionally in small and variable amounts, elucidation of its structure also awaits further detailed study.

FTIR: (film/cm-1) υmax: 3607(m), 3447(s, br), 2962(s), 2910(s), 2876(s), 2083(s), 2046(s), 2021(s), 1989(s).

1H NMR (400 MHz, CDCl3):  0.98 (3H, t, *J*=7.2 Hz, CH3), 1.35 (1H, s, C-OH), 1.39-1.85 (11H, m, CH2), 1.79 (1H, dt, *J*=13.5, 3.2 Hz, CH2) 1.89 (1H, ddd, *J*=13.1, 12.9, 2.2 Hz, CH2)1.98 (1H, dd, *J*=15.0, 4.7 Hz, CH2),2.06-2.15 (1H, m, CH2), 2.20 (1H, dt, *J*=14.8, 1.9 Hz, CH2), 2.60 (1H, td, *J*=14.0, 4.8 Hz, CH)2.77 (1H, dt, *J*=15.4, 7.6 Hz, propCH2), 2.83 (1H, dt, *J*=15.3, 7.6 Hz, propCH2), 3.46 (1H, dt, *J*=12.5, 3.2 Hz, propCH), 4.55 (1H, m, b, CHCl).

13C NMR (100 MHz, CDCl3): 13.9, 18.6, 22.0, 22.7, 29.4, 33.8, 33.9, 34.0, 34.1, 42.6, 47.9, 50.7, 58.0, 72.0, 101.1, 102.4, 200.5(b).

RMS (Electrospray) calcd. for: C22H24Co2ClO6 (M+-OH): 536.9925. Found: 536.9908.

FTIR: (film/cm-1) υmax:3611(w), 3454(m, br), 2959(s), 2933(s), 2872(s), 2088(s), 2084(s), 2045(s), 2019(s), 1964(m), 1624(w).

1H NMR (250 MHz, CDCl3): 0.76-0.93 (1H, m, CH2), 0.97 (3H, app.dt, *J*=7.3, 1.2 Hz, CH3), 1.24 (1H, bs, C-OH), 1.31-1.92 (6H, m, CH2), 1.95-2.23 (2H, m, CH2),2.28 (1H, ddd, *J*=12.3, 3.8, 0.9 Hz, CH2),2.65-3.04 (5H, m, allylCH2, propCHCH), (1H, dt, *J*=9.5, 3.1 Hz, propCH2),3.47 (1H, dt, *J*=9.5, 3.6 Hz, propCH2), 3.92 (1H, tt, *J*=11.8, 4.1 Hz, propCH),5.58 (dt, *J=*9.7, 1.8 Hz, vinylCH), 5 ddd, *J*=9.8, 3.8, 2.4 Hz, CH(OH)-vinylCH).

13C NMR (100 MHz, CDCl3): as a mixture of diastereomers: 13.9, 21.1, 21.6, 21.9, 22.7, 23.2, 25.2, 28.9, 29.7, 31.3, 33.7, 33.9, 34.0, 34.1, 36.3, 41.8, 42.8, 48.7, 49.4, 52.0, 55.8, 71.9, 72.9, 100.8, 100.95, 102.0, 102.7, 126.9, 135.8, 200.5(b).

RMS (Electrospray) calcd. for: C22H25Co2O7 (M+): 519.0264. Found: 519.0266.

Method A:

Complex **6** (35.0 mg, 0.07 mmol, 1.0 eq.) in toluene (1 ml) was added to activated 5Å molecular sieves slurried in toluene at 0 0C. Trimethylamine-*N*-oxide dihydrate (62 mg, 0.61 mmol, 9.0 eq.) was added portionwise and the reaction mixture stirred for 3 hours at 0 0C and warmed to room temperature and stirred for a further 13 hours. The mixture was filtered through a pad of silica. Further purification on silica (petroleum ether 40 0C-60 0C/diethyl ether 1:1) afforded tricycle **7** (7.5 mg, 42%) and diene **8** (13%).

Method B:

Solid supported sulfide resin (1.19 mmol/g) was added to complex **6** (40.9 mg, 0.08 mmol, 1.0 eq.) in 1,2-dichloroethane (2 ml) and the reaction mixture heated at reflux for 1.5 hours before cooling and filtering the black precipitate through a pad of silica. Further purification on silica (petroleum ether 40 0C-60 0C/diethyl ether 1:1) afforded tricycle **7** (12.6 mg, 71%) and diene **8** (21%).

FTIR: (film/cm-1) υmax: 2950(s), 2858(s), 1715(s), 1704(s), 1699(s), 1694(s), 1682(s), 1658(s), 1652(s), 1645(s), 1633(s).

1H NMR (400 MHz, CDCl3): 0.86 (3H, t, *J*=7.0 Hz, CH3), 1.11 (1H, qd, *J*=12.9, 3.6 Hz, CH2), 1.20-1.36 (4H, m, *n-*Bu CH2), 1.57-1.65 (1H, m, CH2), 1.72 (1H, ddd, *J*= 13.6, 7.1, 3.4 Hz, CH2), 1.78 (1H, qt, *J*=13.5, 3.9 Hz), 1.92 (1H, dd, *J*=18.8, 2.2 Hz, C=C-C(O)-CH2), 1.95 (1H, qd, *J*=13.1, 3.3 Hz, CH2), 2.05 (1H, qd, *J*=13.2, 3.4 Hz, CH2), 2.08-2.25 (4H, m, *n*-Bu allylCH2, CH2), 2.31-2.38 (1H, m, C(O)CH2), 2.43 (1H, dt, *J*=12.9, 4.5 Hz, C(O)CH), 2.55 (1H, dd, *J*=18.6, 6.6 Hz, C=C-C(O)-CH2), 2.52 (1H, td, *J*=14.5, 6.2 Hz, C(O)CH2), 2.77-2.86 (1H, m, C=C-C(O)-CH2-CH), 3.19 (1H, dt, *J*=12.8, 4.5 Hz, C=C-CH).

13C NMR (100 MHz, CDCl3): 13.9, 22.5, 22.7, 25.0, 25.1, 25.5, 31.0, 33.9, 35.9, 37.8, 39.8, 41.1, 52.7, 138.7, 174.0, 208.2, 212.4.

RMS (EI) calcd. for C17H24O2 (M+): 260.1776. Found: 260.1788.

Method C:

Complex **6** (32.0 mg, 0.062 mmol) in toluene (15 ml) was added dropwise over 5 minutes to refluxing toluene (15 ml) and the mixture reflux for 30 minutes over which time an initial brown coloration changed to produce a black precipitate. The mixture was cooled and the toluene removed *in vacuo.* The residue was treated with a chloroform solution of 4-*N*-methylmorpholine-*N*-oxide monohydrate (6eq. in 5 ml), before filtering through a pad of silica. Further purification on silica (petroleum ether 40 0C-60 0C/diethyl ether 20:1) afforded *bis-*diene **8** as a 3:1 *E/Z* isomeric mixture(10.1 mg, 69%).

FTIR: (film/cm-1) υmax: 3078(w), 2932(s), 2862(s), 1715(s), 1708(s), 1634(s).

1H NMR (400 MHz, CDCl3): 3:1 *E*/*Z*:  0.92 (3H, t, *J*=7.1 Hz, CH3), 1.24-1.52 (5H, m, *n-*BuCH2), 1.58-2.67 (12H, m, CH2, CH), 2.99 (1H, dt, *J=*12.5, 4.5 Hz, C(O)CH, *E*-isomer), 4.66 (1H, t, *J*=2.0 Hz, vinylCH2, *E*-isomer), 4.70 (1H, t, *J*=1.7 Hz, vinylCH2, *Z*-isomer), 4.86 (1H, t, *J*=2.0 Hz, vinylCH2, *E*-isomer), 5.02 (1H, t, *J=*1.8 Hz, vinylCH2, *Z*-isomer), 5.28 (1H, dd, *J*=7.6, 6.9 Hz, vinylCH-CH2, *Z*-isomer), 5.50 (1H, t, *J*=7.4 Hz, vinylCH-CH2, *E*-isomer).

*E/Z* Configuration determined by 400 MHz ROESY NMR.

13C NMR (100 MHz, CDCl3): (*E*-isomer)  14.0, 22.4, 25.6, 25.7, 26.1, 26.8, 32.0, 34.3, 37.7, 39.9, 52.9, 109.2, 125.5, 140.7, 147.9, 214.5. (*Z*-isomer)  13.9, 22.2, 25.3, 26.6, 26.7, 27.8, 32.4, 35.6, 37.7, 49.0, 53.8, 112.2, 125.9, 140.8, 143.4, 214.5

HRMS (EI) calcd. for C16H24O (M+): 232.1827. Found: 232.1828.

1. D. R. Carbery, J. W. Myatt, S. Reignier, N. D. Miller, J. P. A. Harrity, *Angew. Chem., Int. Ed. Engl.*, 2002, in press. [↑](#footnote-ref-2)
2. *E*/*Z*-Enol ether assignment of **2**-*exo* was made on the basis of the 13C-NMR chemical shifts of the carbon -to the ether oxygen: D. Barillier, M. P. Strobel, L. Morin, D. Paquer, *Tetrahedon,* 1983, **39**, 767. [↑](#footnote-ref-3)
